# Supplementary material for: Duration of Untreated Illness in Patients with Obsessive–Compulsive Disorder and Its Impact on Long-Term Outcome: A Systematic Review
Source: MDPI journal article supplement (doi:10.3390/jpm13101453), 2023-09-29
Supplement: s1 [file s1]

**Table S1.** Risk of Bias assessment in non randomized clinical studies.

| Authors<br>(year of publication)         | Type of study            | Pre-intervention domains    |                       |                         | At-intervention<br>domain   | Post-intervention domains |                             |                       | Overall<br>Risk of Bias |
|------------------------------------------|--------------------------|-----------------------------|-----------------------|-------------------------|-----------------------------|---------------------------|-----------------------------|-----------------------|-------------------------|
|                                          |                          | <i>Confounding<br/>bias</i> | <i>Selection bias</i> | <i>Information bias</i> | <i>Confounding<br/>bias</i> | <i>Selection bias</i>     | <i>Information<br/>bias</i> | <i>Reporting bias</i> |                         |
| <b>Dell’Osso et al.<br/>(2010) [30]</b>  | Longitudinal<br>study    | Moderate                    | Moderate              | Low                     | Moderate                    | Low                       | Low                         | Moderate              | Moderate                |
| <b>Jakubovski et al.<br/>(2013) [31]</b> | Longitudinal<br>study    | High                        | Moderate              | Low                     | High                        | Moderate                  | High                        | High                  | High                    |
| <b>Dell’Osso et al.<br/>(2015) [32]</b>  | Cross-sectional<br>study | High                        | Low                   | Moderate                | Low                         | Low                       | Moderate                    | Moderate              | High                    |
| <b>Poyraz et al.<br/>(2015) [33]</b>     | Cross-sectional<br>study | Moderate                    | Low                   | Low                     | Moderate                    | Low                       | Low                         | Low                   | Moderate                |
| <b>Dell’Osso et al.<br/>(2017) [34]</b>  | Cross-sectional<br>study | Moderate                    | Low                   | Low                     | Low                         | Low                       | Moderate                    | Low                   | Moderate                |
| <b>Albert et al.<br/>(2019) [17]</b>     | Retrospective<br>study   | Moderate                    | Low                   | Low                     | Low                         | Low                       | Moderate                    | Moderate              | Moderate                |
| <b>Perris et al.<br/>(2021) [35]</b>     | Longitudinal<br>study    | Low                         | Low                   | Low                     | Low                         | Low                       | Low                         | Low                   | Low                     |
| <b>Zheng et al.<br/>(2021) [36]</b>      | Longitudinal<br>study    | Moderate                    | Low                   | Low                     | Moderate                    | Low                       | Moderate                    | Low                   | Moderate                |
